# Supplementary material for: A new integrated method of magnetic separation of isoquinoline alkaloids from Coptis chinensis based on their magnetized derivatives and key physical properties
Source: Royal Society of Chemistry journal article supplement (doi:10.1039/d0nj00731e), 2020-01-01
Supplement: d0nj00731e1.pdf [file d0nj00731e1.pdf]

## Supplementary Information

### **A new integrated method of magnetic separation for isoquinoline alkaloids from *Coptis chinensis* based on their magnetized derivates and key physical properties**

Lirong Nie,<sup>a</sup> Xueting Feng,<sup>b</sup> Hang Song,<sup>b</sup> Zicheng Li,<sup>b</sup> and Shun Yao<sup>\*b</sup>

<sup>a</sup> School of Medical Instrument and Food Engineering, University of Shanghai for  
Science and Technology, Shanghai 200093, China

<sup>b</sup> School of Chemical Engineering, Sichuan University, Chengdu 610065, P. R. China

\*Corresponding author: E-mail: [Cusack@scu.edu.cn](mailto:Cusack@scu.edu.cn)

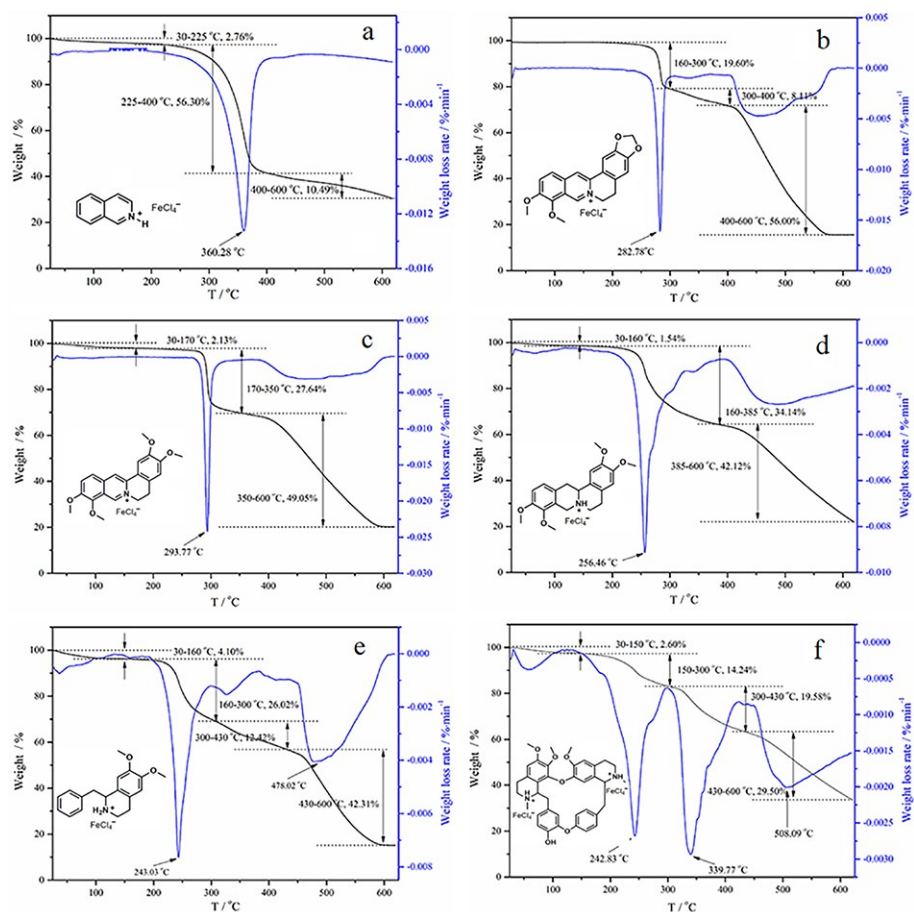

**Fig. S1.** TG/DTG analysis of [isoquin·H][FeCl<sub>4</sub>](a), [berberine][FeCl<sub>4</sub>](b), [palmatine][FeCl<sub>4</sub>](c), [tetrahydropalmatine·H][FeCl<sub>4</sub>](d), [tetrahydropapaverine·H][FeCl<sub>4</sub>](e) and [berbamine·H][FeCl<sub>4</sub>]<sub>2</sub>(f)

**Table S1** Solubility properties of six magnetic compounds in common solvents at room temperature

| Solvents        | A     | B  | C   | D     | E     | F     |
|-----------------|-------|----|-----|-------|-------|-------|
| water           | +++++ | +  | +++ | ++    | +++++ | +++   |
| methanol        | +++++ | ++ | ++  | ++++  | +++   | +++++ |
| acetonitrile    | +++++ | +  | ++  | +++++ | +++++ | +++   |
| ethanol         | +++++ | +  | -   | +++   | +     | ++    |
| acetone         | +++++ | +  | ++  | +++++ | +++++ | ++    |
| chloroform      | --    | -  | -   | ++    | -     | --    |
| isopropanol     | +++   | -  | -   | +     | -     | --    |
| ethyl acetate   | +++++ | -  | -   | +++++ | ++    | --    |
| n-propanol      | ++++  | -  | -   | ++    | ++    | --    |
| n-butanol       | +++   | -  | -   | +     | +     | --    |
| dichloromethane | +     | ++ | -   | ++++  | +     | --    |
| isobutanol      | +     | -  | -   | --    | +     | --    |
| toluene         | --    | -  | -   | --    | --    | --    |
| cyclohexane     | --    | -- | --  | --    | --    | --    |
| n-hexane        | --    | -- | --  | --    | --    | --    |

Note: A, B, C, D, E and F represent [isoquin-H][FeCl<sub>4</sub>], [berberine][FeCl<sub>4</sub>], [palmatine][FeCl<sub>4</sub>], [tetrahydropalmatine-H][FeCl<sub>4</sub>], [tetrahydropapaverine-H][FeCl<sub>4</sub>] and [berbamine-H][FeCl<sub>4</sub>]<sub>2</sub>, respectively; insoluble (--), practically insoluble (-), very slightly soluble (+), slightly soluble (++), sparingly soluble (+++), soluble (++++), freely soluble (+++++), very soluble (+++++).

**Table S2** Experimental data and computational results of magnetic susceptibility

| Current/A                                                              | Magnetic field/Oe | $\Delta m_{\text{sample+tube}}/\text{mg}$ | $\Delta m_{\text{tube}}/\text{mg}$ | $\chi_{\text{ig}} \times 10^5/\text{emu} \cdot \text{g}^{-1}$ | $\chi_{\text{g}} \times 10^5/\text{emu} \cdot \text{g}^{-1}$ |
|------------------------------------------------------------------------|-------------------|-------------------------------------------|------------------------------------|---------------------------------------------------------------|--------------------------------------------------------------|
| [isoquin·H][FeCl <sub>4</sub> ](m=0.8935 g, h=6.90 cm)                 |                   |                                           |                                    |                                                               |                                                              |
| 1.52                                                                   | 2000              | 12.2                                      | 0.6                                | 5.449                                                         |                                                              |
| 2.25                                                                   | 3000              | 27.3                                      | 1.1                                | 5.493                                                         |                                                              |
| 3.01                                                                   | 4000              | 48.0                                      | 2.2                                | 5.401                                                         |                                                              |
| 3.76                                                                   | 5000              | 73.7                                      | 3.2                                | 5.321                                                         | 5.366±1.5%                                                   |
| 4.53                                                                   | 6000              | 106.1                                     | 4.5                                | 5.325                                                         |                                                              |
| 5.31                                                                   | 7000              | 143.7                                     | 6.2                                | 5.293                                                         |                                                              |
| 6.17                                                                   | 8000              | 187.3                                     | 8.2                                | 5.279                                                         |                                                              |
| [tetrahydropapaverine·H][FeCl <sub>4</sub> ](m=0.4662 g, h=4.55 cm)    |                   |                                           |                                    |                                                               |                                                              |
| 1.52                                                                   | 2000              | 5.60                                      | 0.4                                | 3.533                                                         |                                                              |
| 2.25                                                                   | 3000              | 12.5                                      | 0.7                                | 3.563                                                         |                                                              |
| 3.01                                                                   | 4000              | 21.8                                      | 2.0                                | 3.363                                                         |                                                              |
| 3.76                                                                   | 5000              | 34.1                                      | 3.6                                | 3.315                                                         | 3.392±3.2%                                                   |
| 4.53                                                                   | 6000              | 49.0                                      | 5.0                                | 3.321                                                         |                                                              |
| 5.31                                                                   | 7000              | 66.4                                      | 6.8                                | 3.305                                                         |                                                              |
| 6.17                                                                   | 8000              | 87.2                                      | 8.5                                | 3.342                                                         |                                                              |
| [tetrahydropalmatine·H][FeCl <sub>4</sub> ](m=0.7357 g, h=6.50 cm)     |                   |                                           |                                    |                                                               |                                                              |
| 1.52                                                                   | 2000              | 6.70                                      | 0.2                                | 3.428                                                         |                                                              |
| 2.25                                                                   | 3000              | 14.9                                      | 0.5                                | 3.386                                                         |                                                              |
| 3.01                                                                   | 4000              | 26.5                                      | 1.3                                | 3.353                                                         |                                                              |
| 3.76                                                                   | 5000              | 41.6                                      | 2.5                                | 3.352                                                         | 3.345±1.5%                                                   |
| 4.53                                                                   | 6000              | 59.2                                      | 3.9                                | 3.316                                                         |                                                              |
| 5.31                                                                   | 7000              | 80.5                                      | 5.6                                | 3.296                                                         |                                                              |
| 6.17                                                                   | 8000              | 105.0                                     | 7.9                                | 3.287                                                         |                                                              |
| [palmatine][FeCl <sub>4</sub> ](m=0.2500 g, h=4.65 cm)                 |                   |                                           |                                    |                                                               |                                                              |
| 1.52                                                                   | 2000              | 2.8                                       | 0.5                                | 2.895                                                         |                                                              |
| 2.25                                                                   | 3000              | 6.4                                       | 1.3                                | 2.853                                                         |                                                              |
| 3.01                                                                   | 4000              | 10.9                                      | 2.4                                | 2.674                                                         |                                                              |
| 3.76                                                                   | 5000              | 16.8                                      | 3.5                                | 2.678                                                         | 2.703±4.5%                                                   |
| 4.53                                                                   | 6000              | 23.5                                      | 4.9                                | 2.601                                                         |                                                              |
| 5.31                                                                   | 7000              | 31.7                                      | 6.3                                | 2.609                                                         |                                                              |
| 6.17                                                                   | 8000              | 41.3                                      | 8.1                                | 2.611                                                         |                                                              |
| [berberine][FeCl <sub>4</sub> ](m=0.4651 g, h=7.50 cm)                 |                   |                                           |                                    |                                                               |                                                              |
| 1.52                                                                   | 2000              | 2.8                                       | 0.3                                | 2.483                                                         |                                                              |
| 2.25                                                                   | 3000              | 6.5                                       | 1.1                                | 2.384                                                         |                                                              |
| 3.01                                                                   | 4000              | 11.5                                      | 1.8                                | 2.396                                                         |                                                              |
| 3.76                                                                   | 5000              | 17.9                                      | 3.1                                | 2.352                                                         | 2.386±2.0%                                                   |
| 4.53                                                                   | 6000              | 25.7                                      | 4.3                                | 2.361                                                         |                                                              |
| 5.31                                                                   | 7000              | 35.8                                      | 6.3                                | 2.392                                                         |                                                              |
| 6.17                                                                   | 8000              | 45.9                                      | 8.3                                | 2.334                                                         |                                                              |
| [berbamine·H][FeCl <sub>4</sub> ] <sub>2</sub> (m=0.7834 g, h=6.90 cm) |                   |                                           |                                    |                                                               |                                                              |
| 1.52                                                                   | 2000              | 4.0                                       | 0.2                                | 2.061                                                         |                                                              |
| 2.25                                                                   | 3000              | 8.8                                       | 0.5                                | 2.001                                                         |                                                              |
| 3.01                                                                   | 4000              | 16.2                                      | 1.3                                | 2.021                                                         |                                                              |
| 3.76                                                                   | 5000              | 25.8                                      | 2.5                                | 2.022                                                         | 2.021±1.0%                                                   |
| 4.53                                                                   | 6000              | 37.6                                      | 3.9                                | 2.031                                                         |                                                              |
| 5.31                                                                   | 7000              | 50.9                                      | 5.6                                | 2.006                                                         |                                                              |
| 6.17                                                                   | 8000              | 67.0                                      | 7.9                                | 2.004                                                         |                                                              |

**Table S3** Adsorbed mass of magnetic compounds with different particle-size on the unit area of the magnet (375.7 mT, 25°C)

| Magnetic compounds                             | Average particle size*/mm | Adsorbed mass/g | g/m <sup>2</sup> | mol/m <sup>2</sup> |
|------------------------------------------------|---------------------------|-----------------|------------------|--------------------|
| [isoquin·H][FeCl <sub>4</sub> ]                | 0.180                     | 0.0241          | 1228             | 3.746              |
|                                                | 0.150                     | 0.0412          | 2099             | 6.404              |
|                                                | 0.106                     | 0.0850          | 4331             | 13.21              |
|                                                | 0.075                     | 0.1311          | 6680             | 20.38              |
| [tetrahydropapaverine·H][FeCl <sub>4</sub> ]   | 0.180                     | 0.0280          | 1427             | 2.632              |
|                                                | 0.150                     | 0.0462          | 2354             | 4.343              |
|                                                | 0.106                     | 0.0893          | 4550             | 8.394              |
|                                                | 0.075                     | 0.1423          | 7251             | 13.38              |
| [tetrahydropalmatine·H][FeCl <sub>4</sub> ]    | 0.180                     | 0.0190          | 968.2            | 1.747              |
|                                                | 0.150                     | 0.0346          | 1763             | 3.182              |
|                                                | 0.106                     | 0.0574          | 2976             | 5.371              |
|                                                | 0.075                     | 0.0943          | 4428             | 7.992              |
| [palmatine][FeCl <sub>4</sub> ]                | 0.180                     | 0.0123          | 626.8            | 1.139              |
|                                                | 0.150                     | 0.0148          | 754.1            | 1.371              |
|                                                | 0.106                     | 0.0197          | 1004             | 1.825              |
|                                                | 0.075                     | 0.0243          | 1238             | 2.251              |
| [berberine][FeCl <sub>4</sub> ]                | 0.180                     | 0.0090          | 458.6            | 0.859              |
|                                                | 0.150                     | 0.0118          | 601.3            | 1.126              |
|                                                | 0.106                     | 0.0152          | 772.5            | 1.447              |
|                                                | 0.075                     | 0.0208          | 1060             | 1.985              |
| [berbamine·H][FeCl <sub>4</sub> ] <sub>2</sub> | 0.180                     | 0.0149          | 759.2            | 0.755              |
|                                                | 0.150                     | 0.0188          | 958.0            | 0.952              |
|                                                | 0.106                     | 0.0237          | 1208             | 1.200              |
|                                                | 0.075                     | 0.0316          | 1610             | 1.601              |

\*0.180 mm corresponds to 80~100 mesh; 0.150 mm corresponds to 100~150 mesh; 0.106 mm corresponds to 150~200 mesh; 0.075 mm corresponds to 200 mesh; average error range: ±6.0%.

**Table S4** Adsorption mass of magnetic compounds on the unit area of the magnet at different magnetic field intensities (100-150 mesh, 0.150 mm, 25°C, average error range:  $\pm 5.5\%$ )

| Magnetic field/mT | Magnetic compounds                             | Adsorption mass/g | g/m <sup>2</sup> | mol/m <sup>2</sup> |
|-------------------|------------------------------------------------|-------------------|------------------|--------------------|
| 337.5             | [isoquin·H][FeCl <sub>4</sub> ]                | 0.0304            | 1549             | 4.725              |
|                   | [tetrahydropapaverine·H][FeCl <sub>4</sub> ]   | 0.0336            | 1712             | 3.158              |
|                   | [tetrahydropalmatine·H][FeCl <sub>4</sub> ]    | 0.0219            | 1116             | 2.014              |
|                   | [palmatine][FeCl <sub>4</sub> ]                | 0.0117            | 596.2            | 1.084              |
|                   | [berberine][FeCl <sub>4</sub> ]                | 0.0087            | 443.3            | 0.830              |
|                   | [berbamine·H][FeCl <sub>4</sub> ] <sub>2</sub> | 0.0159            | 810.2            | 0.805              |
| 373.5             | [isoquin·H][FeCl <sub>4</sub> ]                | 0.0435            | 2217             | 6.762              |
|                   | [tetrahydropapaverine·H][FeCl <sub>4</sub> ]   | 0.0469            | 2390             | 4.408              |
|                   | [tetrahydropalmatine·H][FeCl <sub>4</sub> ]    | 0.0338            | 1722             | 3.108              |
|                   | [palmatine][FeCl <sub>4</sub> ]                | 0.0149            | 759.2            | 1.380              |
|                   | [berberine][FeCl <sub>4</sub> ]                | 0.0117            | 596.2            | 1.116              |
|                   | [berbamine·H][FeCl <sub>4</sub> ] <sub>2</sub> | 0.0186            | 947.8            | 0.942              |
| 390.2             | [isoquin·H][FeCl <sub>4</sub> ]                | 0.0517            | 2634             | 8.036              |
|                   | [tetrahydropapaverine·H][FeCl <sub>4</sub> ]   | 0.0564            | 2873             | 5.302              |
|                   | [tetrahydropalmatine·H][FeCl <sub>4</sub> ]    | 0.0428            | 2181             | 3.936              |
|                   | [palmatine][FeCl <sub>4</sub> ]                | 0.0165            | 840.8            | 1.529              |
|                   | [berberine][FeCl <sub>4</sub> ]                | 0.0131            | 667.5            | 1.250              |
|                   | [berbamine·H][FeCl <sub>4</sub> ] <sub>2</sub> | 0.0214            | 1090             | 1.084              |
| 424.4             | [isoquin·H][FeCl <sub>4</sub> ]                | 0.0645            | 3287             | 10.03              |
|                   | [tetrahydropapaverine·H][FeCl <sub>4</sub> ]   | 0.0726            | 3699             | 6.824              |
|                   | [tetrahydropalmatine·H][FeCl <sub>4</sub> ]    | 0.0581            | 2961             | 5.343              |
|                   | [palmatine][FeCl <sub>4</sub> ]                | 0.0182            | 927.4            | 1.686              |
|                   | [berberine][FeCl <sub>4</sub> ]                | 0.0148            | 754.1            | 1.412              |
|                   | [berbamine·H][FeCl <sub>4</sub> ] <sub>2</sub> | 0.0259            | 1320             | 1.312              |

**Table S5** Adsorption mass of magnetic compounds based on the unit area of the magnet at different temperature (100~150 mesh, 0.150 mm, 375.7 mT, average error range:  $\pm 5.8\%$ )

| T     | Magnetic compounds                             | Adsorption mass/g | g/m <sup>2</sup> | mol/m <sup>2</sup> |
|-------|------------------------------------------------|-------------------|------------------|--------------------|
| 25°C  | [isoquin·H][FeCl <sub>4</sub> ]                | 0.0412            | 2099             | 6.404              |
|       | [tetrahydropapaverine·H][FeCl <sub>4</sub> ]   | 0.0462            | 2354             | 4.343              |
|       | [tetrahydropalmatine·H][FeCl <sub>4</sub> ]    | 0.0346            | 1763             | 3.182              |
|       | [palmatine][FeCl <sub>4</sub> ]                | 0.0148            | 754.2            | 1.371              |
|       | [berberine][FeCl <sub>4</sub> ]                | 0.0118            | 601.3            | 1.126              |
|       | [berbamine·H][FeCl <sub>4</sub> ] <sub>2</sub> | 0.0188            | 958.0            | 0.952              |
| -20°C | [isoquin·H][FeCl <sub>4</sub> ]                | 0.4529            | 2308             | 70.39              |
|       | [tetrahydropapaverine·H][FeCl <sub>4</sub> ]   | 0.4861            | 2477             | 45.69              |
|       | [tetrahydropalmatine·H][FeCl <sub>4</sub> ]    | 0.3905            | 1990             | 35.91              |
|       | [palmatine][FeCl <sub>4</sub> ]                | 0.2435            | 1241             | 22.56              |
|       | [berberine][FeCl <sub>4</sub> ]                | 0.1764            | 8988             | 16.83              |
|       | [berbamine·H][FeCl <sub>4</sub> ] <sub>2</sub> | 0.2956            | 1506             | 14.97              |
